# Supplementary material for: Maternal Nanog is required for zebrafish embryo architecture and for cell viability during gastrulation
Source: Oxford University Press journal article supplement (doi:10.1242/dev.155366), 2017-11-28
Supplement: dev155366supp.pdf [file dev155366supp.pdf]

## Supplementary material

### Supplementary movies

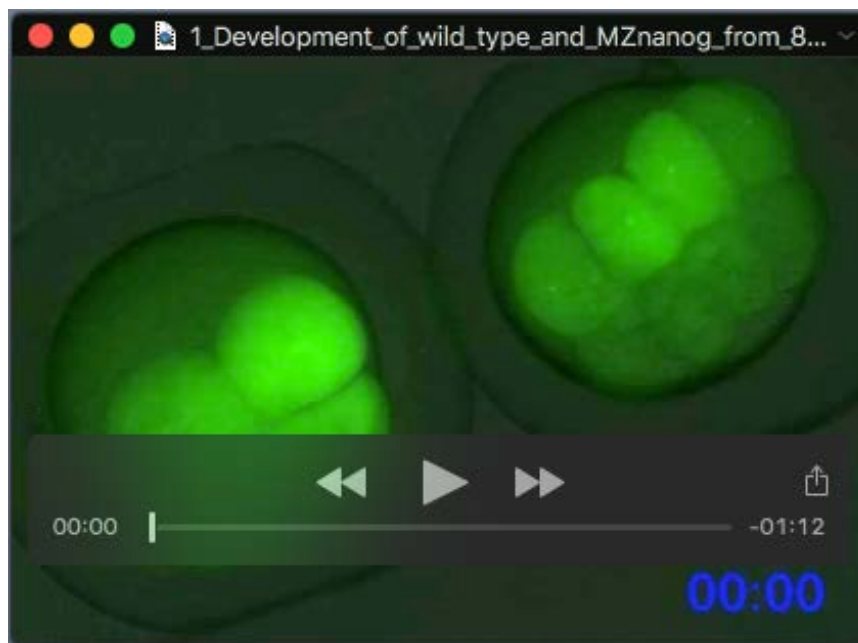

**Movie 1. *MZnanog* mutant show proper cleavages during first 3 hours of development and abnormal epiboly.** The movie starts when wild-type (right) and *MZnanog* (left) embryos are at 4-cell stage. For visualization, the embryos were injected with SYTOX Green at 1-cell stage. Following the cleavages from 4-cell to 1k-cell stage, there is no recognizable difference between wild-type and mutant embryos. *Nanog* mutants undergo the cleavages with the same timing and with the same number of cycles, which we confirmed by counting cell cycles (data not shown). The movie stops after 21 hours when the mutant embryo died through yolk lysis. The movie was recorded at room temperature.

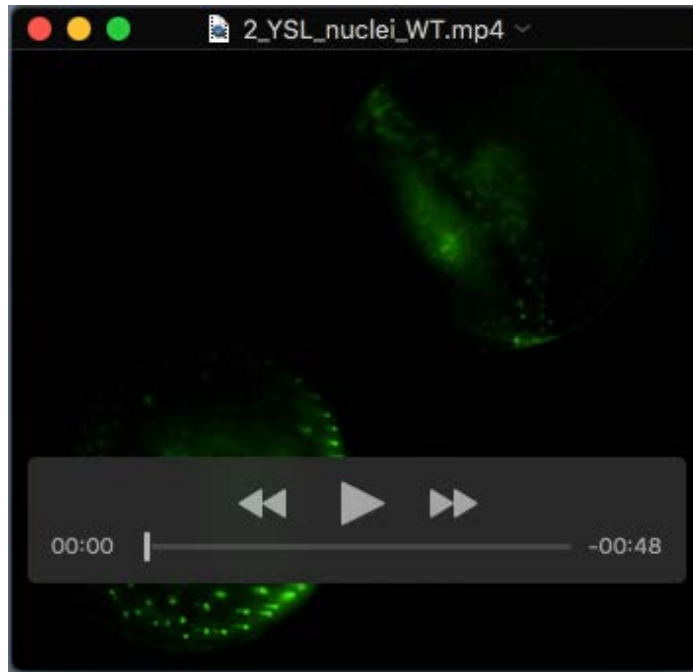

**Movie 2. YSL nuclei movements in wild type embryos.** Embryos were injected with SYTOX Green at 1-cell stage to visualize the YSL. The injected embryos were embedded in low melting agarose to show the animal (below) and lateral (above) view and the movie was started when they, reached oblong stage. Frames were taken every 3 min. Note the changing distribution of the YSL nuclei: YSL nuclei first stay as 3 rows in the periphery of the yolk, then the nuclei aligned at one row and as doming starts some YSL nuclei migrate to the middle.

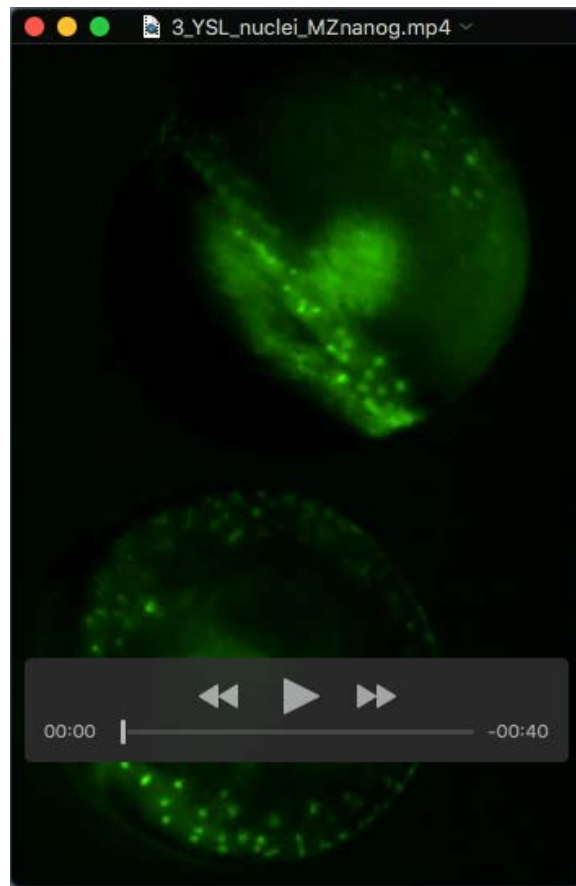

**Movie 3. YSL nuclei movement in *MZnanog* embryos is impaired.** Embryos were injected with SYTOX Green at 1-cell stage to visualize YSL. The movie was started when the control wild type embryos reached oblong stage, frames were taken every 3 min. Embryo below is in animal view, embryo above is in lateral view. Note that no nuclei movement or doming is visible until the yolk lysis.

## Supplementary figures

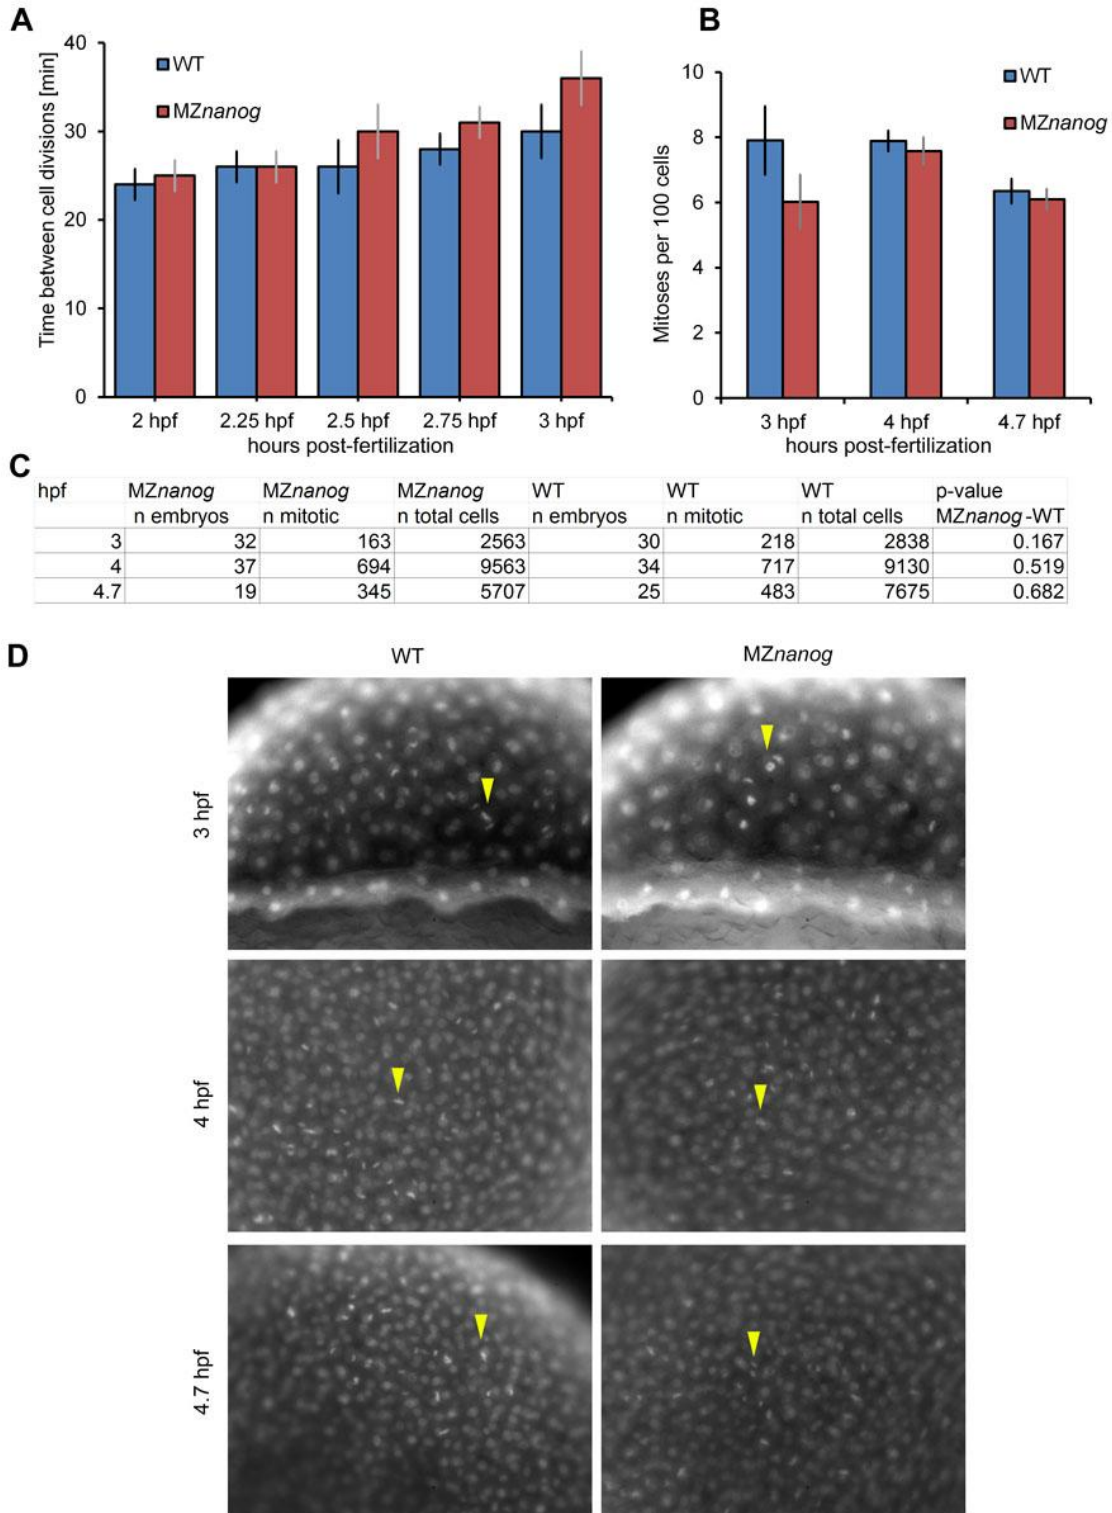

**Fig. S1. Pre-ZGA and post-ZGA cell division rates in WT and MZnanog are not significantly different.** (A) Timing of pre-MBT cleavages in wild-type and MZnanog embryos.

Y-axis: Time between cell divisions (from 2 – 3 hpf) was estimated from 3 time-lapse records, including Supplementary Movie 1. Error bars: standard deviation, n=3. (B-D) Mitotic rates of WT and MZ*nanog* at 3 hpf, 4 hpf and 4.7 hpf (see Materials and Methods). (D) Y axis: number of mitoses per 100 cells, Error bars: SEM. (C) Summary table for mitotic cell and total cell counts (see Table S1 for all counts per embryo). (D) Example images of each stage and genotype, yellow arrowheads show mitotic cells. Scale bar corresponds to 125  $\mu\text{m}$ .

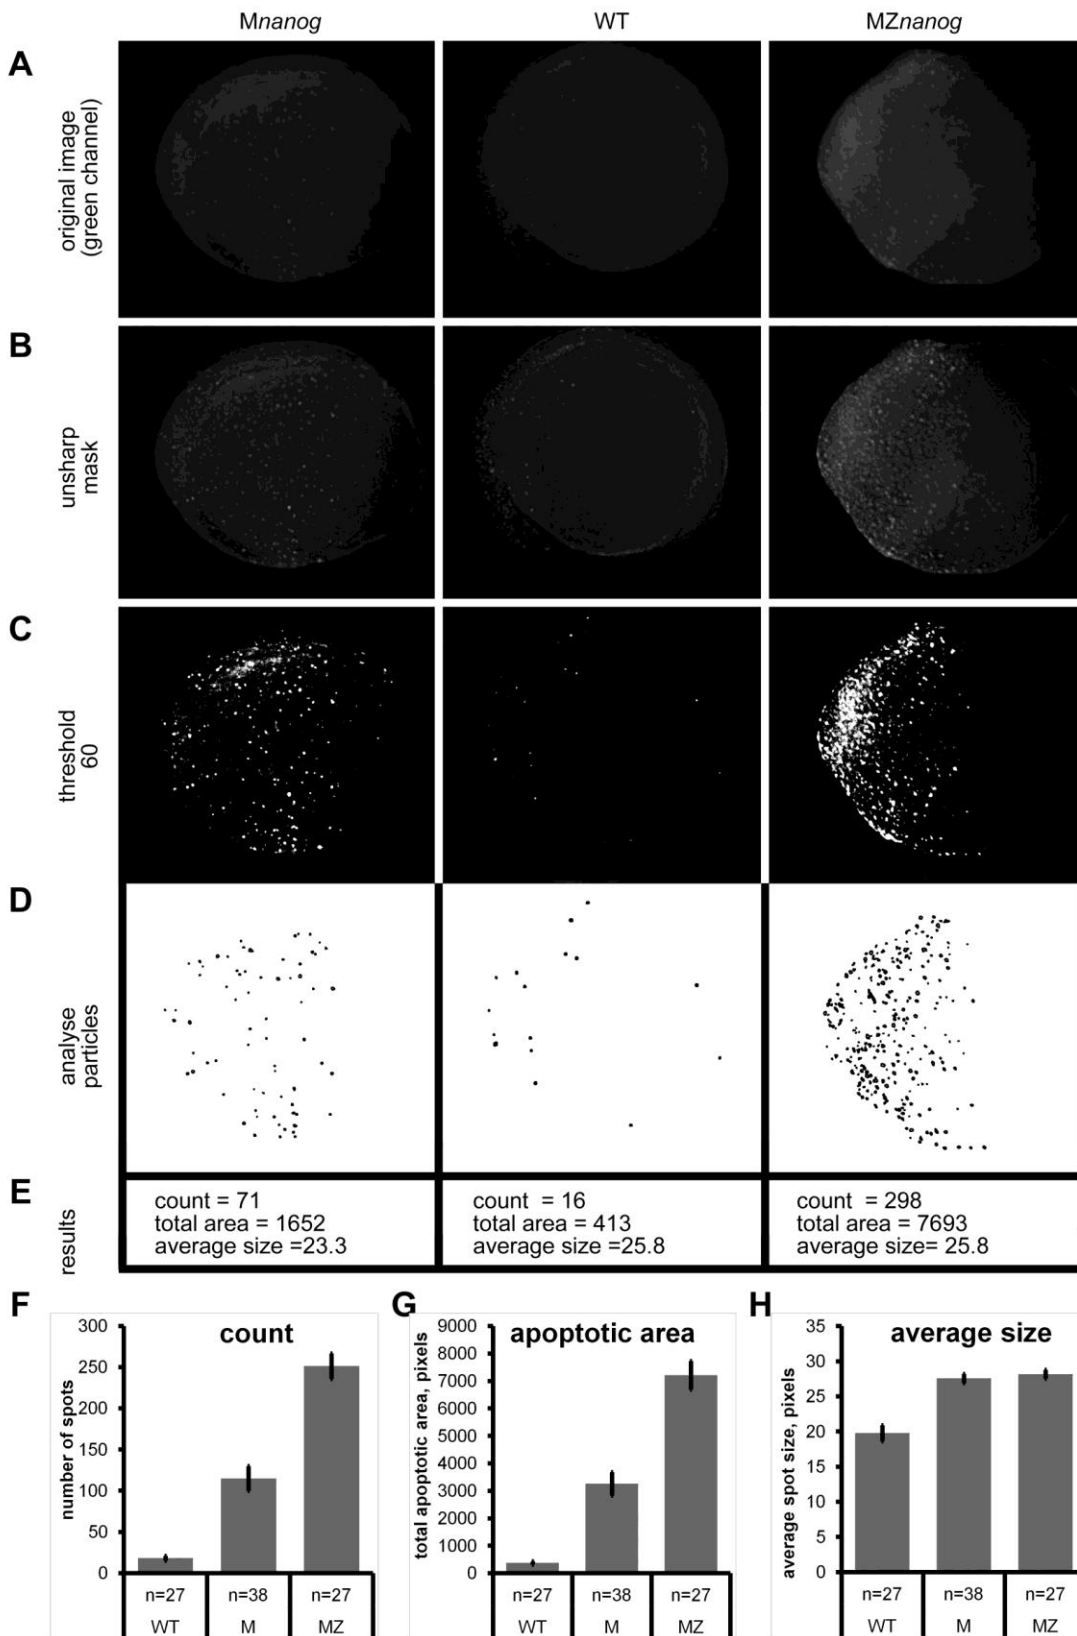

**Fig. S2. Image processing pipeline for comparing relative cell death rates within the experiment.** (A-E) Processing of 3 images (*Mnanog*, WT, *MZnanog*) shown at Fig. 2 of the

main text is taken as example. Embryos were stained and images taken as described in “Materials and Methods”. Then images in TIFF format (A) were sharpened in Adobe Photoshop with “Unsharp Mask” Filter (B), and thresholded in ImageJ (C). The spots of 4-100 pixels size visualized in (D) representing clusters of dead cells or single cells were taken as a measure of dead cells per embryo. Count, total area and average size of the spots per image (E) was recorded for 20-40 images per condition. (F-H) statistics of count (F), total area (G) and average size (H) for WT, *Mnanog* and *MZnanog* using threshold 60, which gave in the closest values for average spot size in different experimental groups (H). Total area was normalized to the average *MZnanog* value and used as a relative measure for the amount of cell death between experimental conditions (genotypes or treatments). Scale bar in A-D indicates 100  $\mu\text{m}$ .

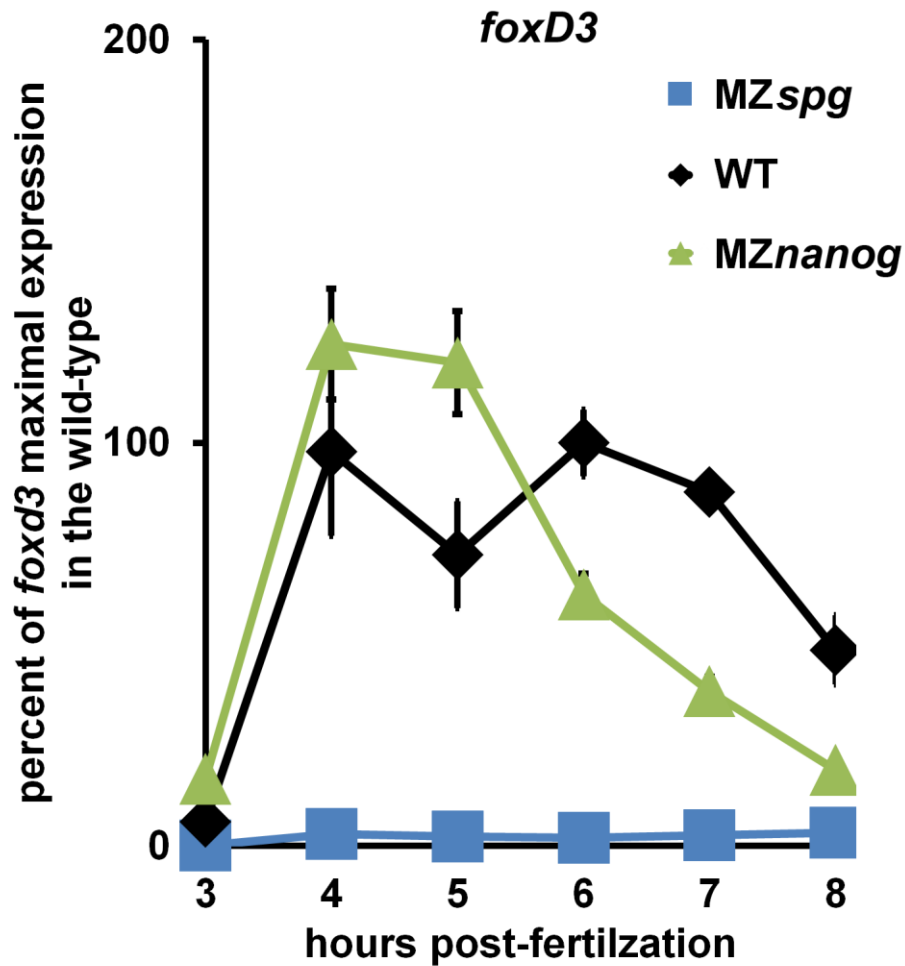

**Fig. S3. Expression of *foxD3* in the wild-type, *MZnanog* and *MZspg* embryos.** Graph shows *foxD3* expression time-curve generated by quantitative real time PCR in the wild-type, *MZnanog*, and *MZspg*. Embryos were collected in 1 hour intervals from 3 hpf till 8 hpf. All expression values were normalized to maximal expression in the wild-type. Note that *foxD3* expression starts at the same time in the *MZnanog* and in the wild-type, while in *MZspg* *foxD3* expression is missing as reported before (Onichtchouk et al., 2010).



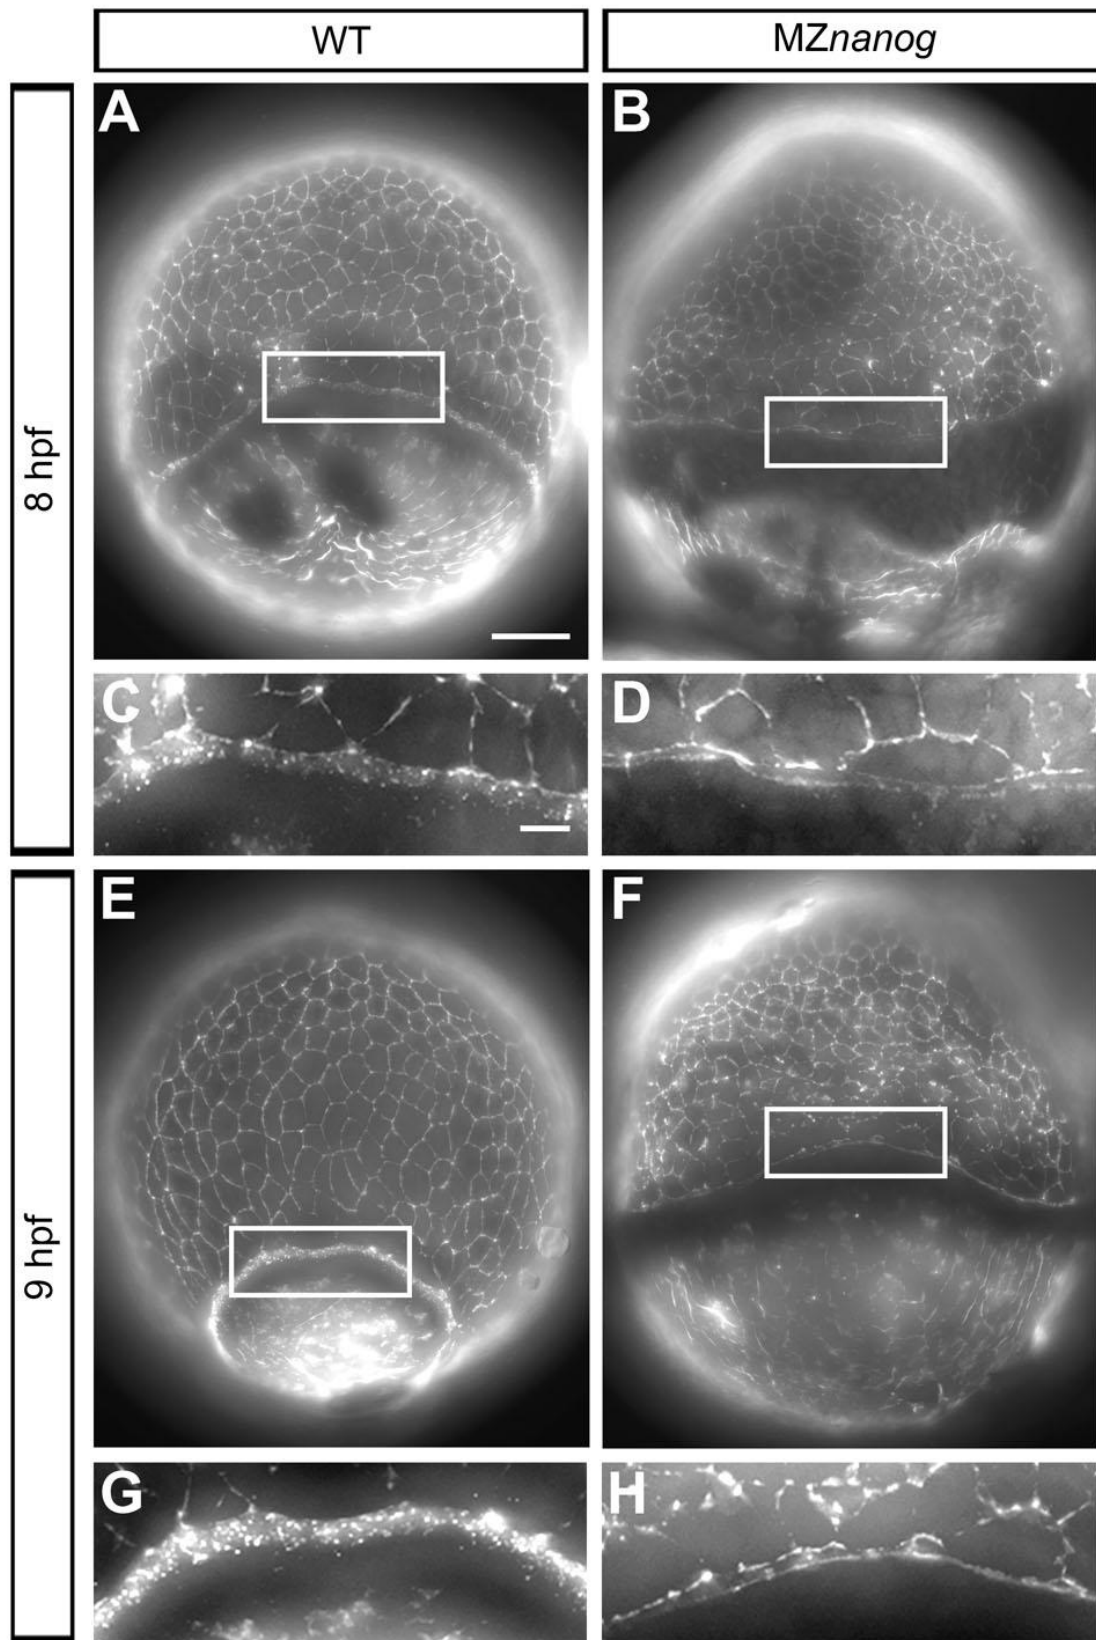

**Fig. S4. F-actin ring does not form and EVL-YSL border does not constrict in *MZnanog*.**  
(A-H) F-actin ring visualization by rhodamin-phalloidin staining of wild-type and *MZnanog*

embryos at 8 hpf and 9 hpf (75% epiboly of wild-type control and 90% epiboly of wild-type control), as indicated. The higher magnification views of boxed areas show the endocytic vesicles in the wild-type (C,G) which are missing in *MZnanog* (D,H). Note that at the 8 hpf higher magnification view two faint actin bands are visible in *MZnanog* - one in the EVL cells and one in the YSL (D). This may indicate detachment of the marginal EVL cells from the YSL. Scale bars correspond to 100  $\mu\text{m}$  in A,B,E,F and 20  $\mu\text{m}$  in C,D,G,H.

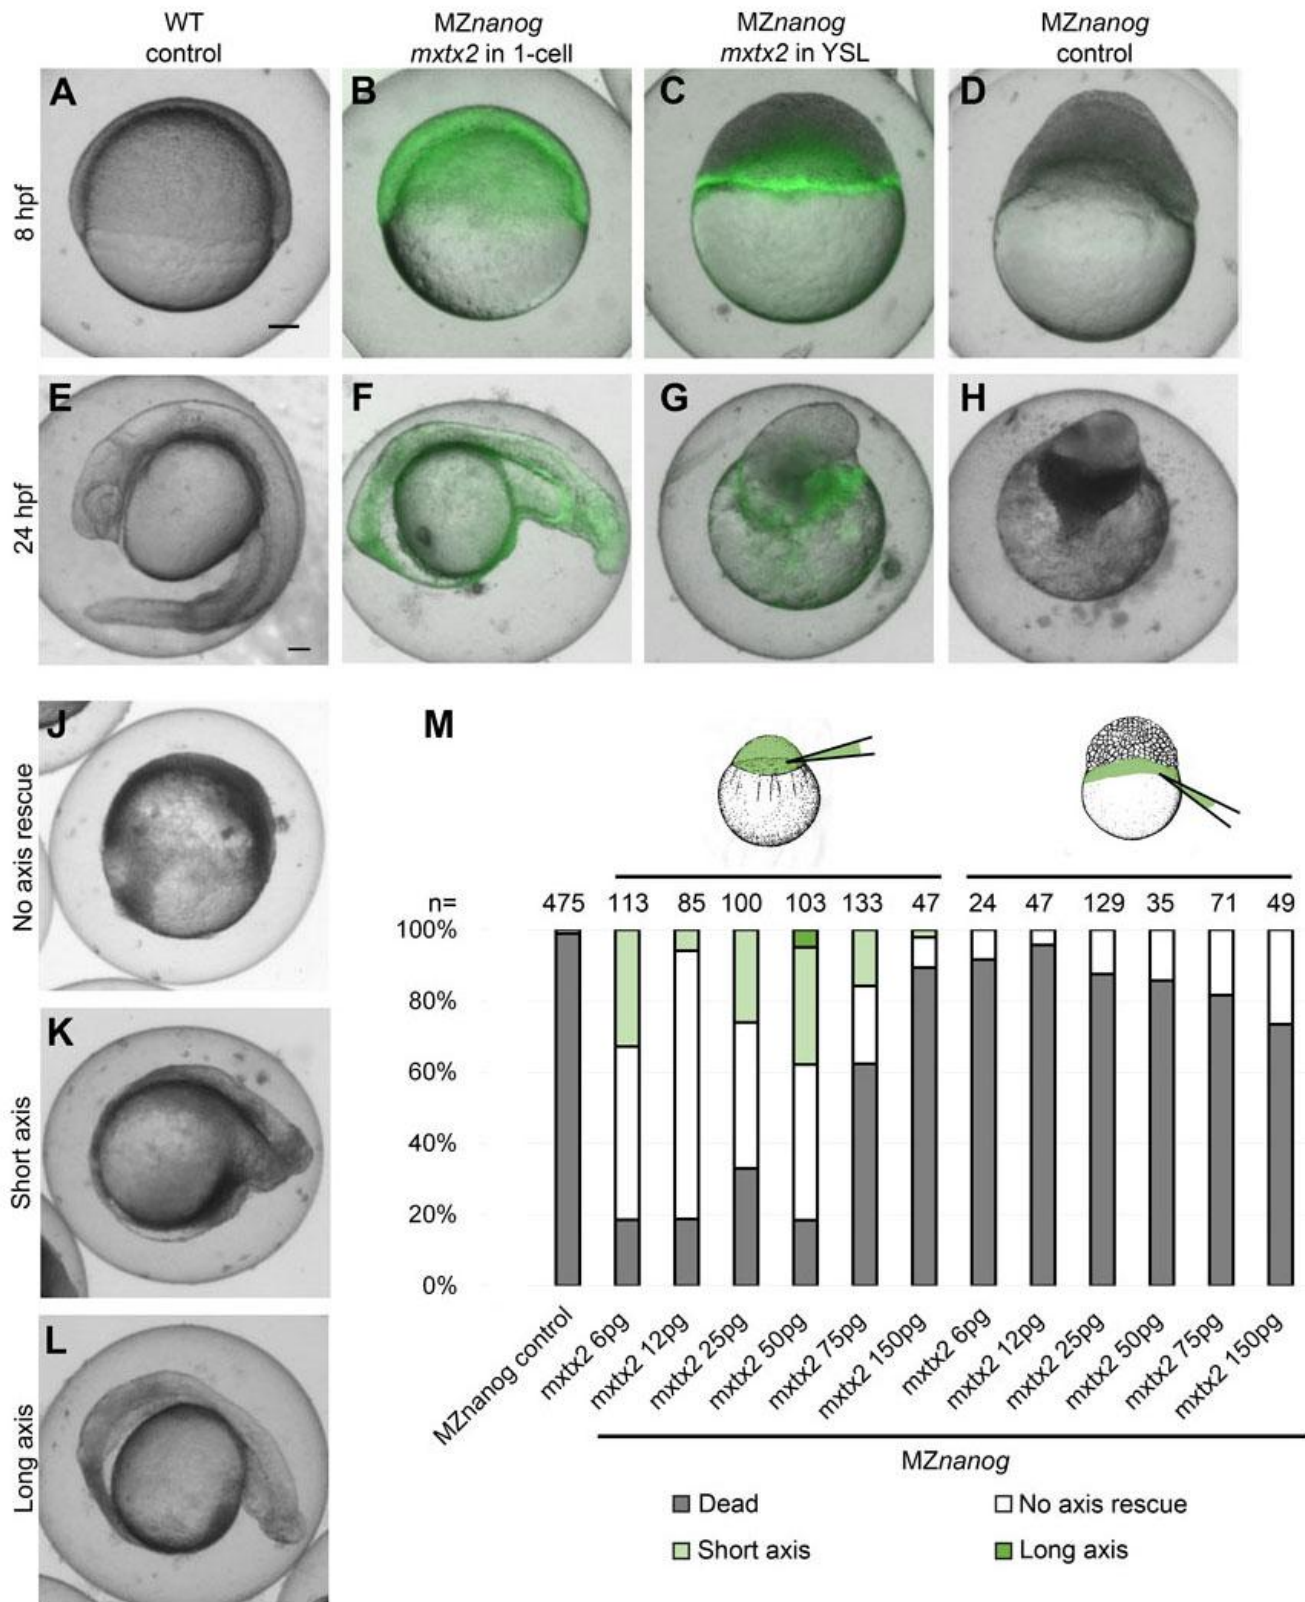

**Fig. S5. *mxtx2* mRNA injection at 1 cell stage but not to the YSL rescues epiboly in *MZnanog* embryos.** (A-H) Representative embryo phenotypes from single rescue experiment: *mxtx2* mRNA was co-injected with Alexa488 dextran (green) in the YSL (C, G) or

in 1-cell stage (B,F) of *MZnanog* embryos. Live images in DIC and green fluorescence were taken from injected and non-injected wild-type and *MZnanog* at 75% epiboly of the wild-type control (8 hpf) and 24 hpf, as indicated. Note that *MZnanog* embryos injected into 1-cell stage restored epiboly (B) and some of them formed the partial body axis with tail (F). The phenotypes of YSL-injected *MZnanog* embryos were not distinguishable from non-injected *MZnanog* at 8 hpf (compare C and D) and 24 hpf (G and H). Scale bars in A-H indicate 100  $\mu\text{m}$ . (J-L) Phenotypic classes used for scoring the rescued phenotypes in *mxtx2* experiment at 24 hpf: no axis rescue (J), short axis rescue (K) or long rescue (L). (M) Rescue statistics after 24 hpf, six concentrations of *mxtx2* mRNA (indicated below the graph in pg per embryo) were used for injections of *MZnanog* embryos at the 1-cell stage and to the YSL at the 512-cell stage, as indicated above the graph. Phenotypic classes used for scoring are shown in J-L. Numbers of injected or non-injected embryos are indicated above the bars.

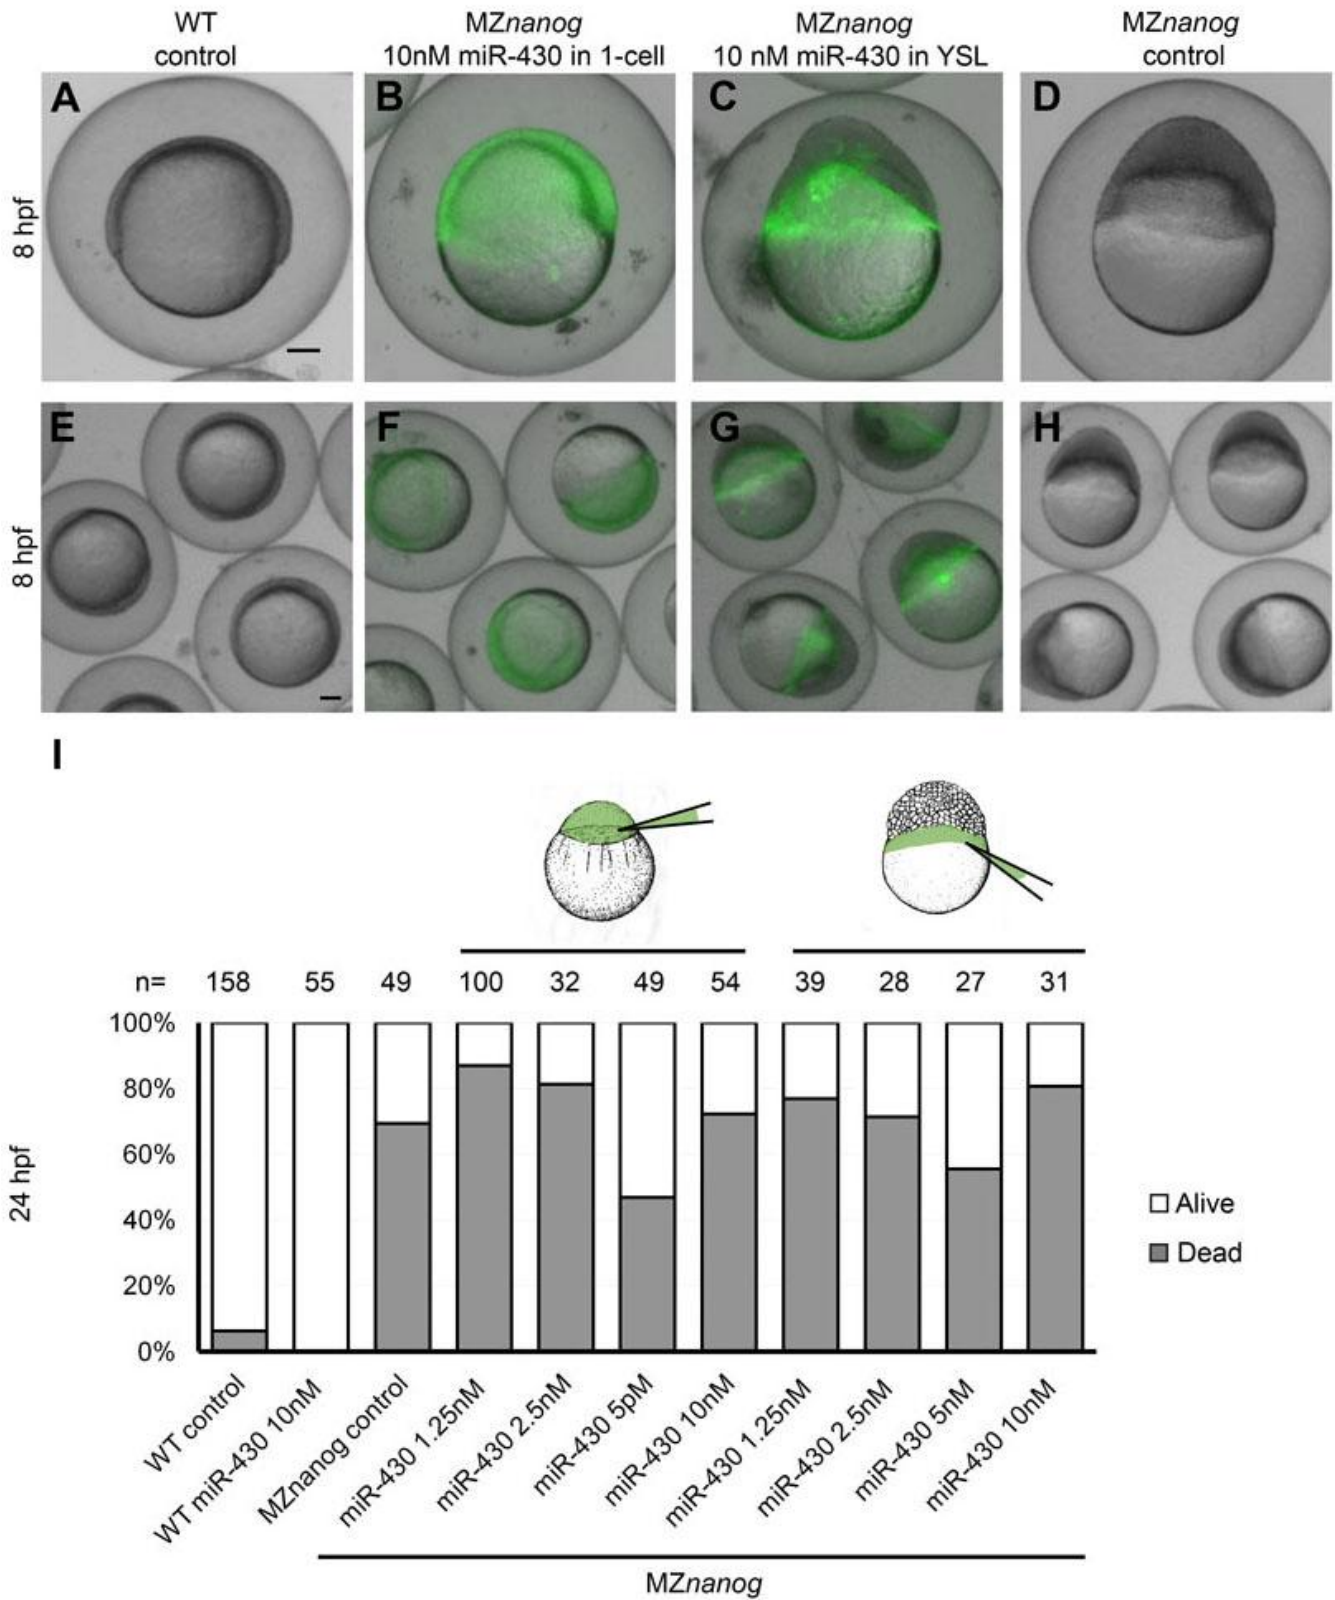

**Fig. S6. miR-430 injection at 1-cell stage but not into the YSL rescues epiboly in *MZnanog* embryos.** (A-D) Representative embryo phenotypes and (E-H) groups of embryos from single rescue experiment: miR-430 was co-injected with Alexa488 dextran (green) in the

YSL (C, G) or in 1-cell stage (B,F) of *MZnanog* embryos. Live images in DIC and green fluorescence were taken from injected and non-injected WT and *MZnanog* at 75% epiboly of wild-type control (8 hpf). Note that *MZnanog* embryos injected into 1-cell stage restored epiboly (compare B,F with D,H) while the phenotype of YSL-injected *MZnanog* embryos were not distinguishable from non-injected *MZnanog* at 8 hpf (compare C,G with D,H). (I) miR-430 injected *MZnanog* embryos did not form embryonic axes and death rates at 24 hpf were not significantly improved. (I) Rescue statistics after 24 hpf, four concentrations of miR-430 (indicated below the graph) were used for injections of *MZnanog* embryos at the 1-cell stage and to the YSL at the 512-cell stage, as indicated above the graph.

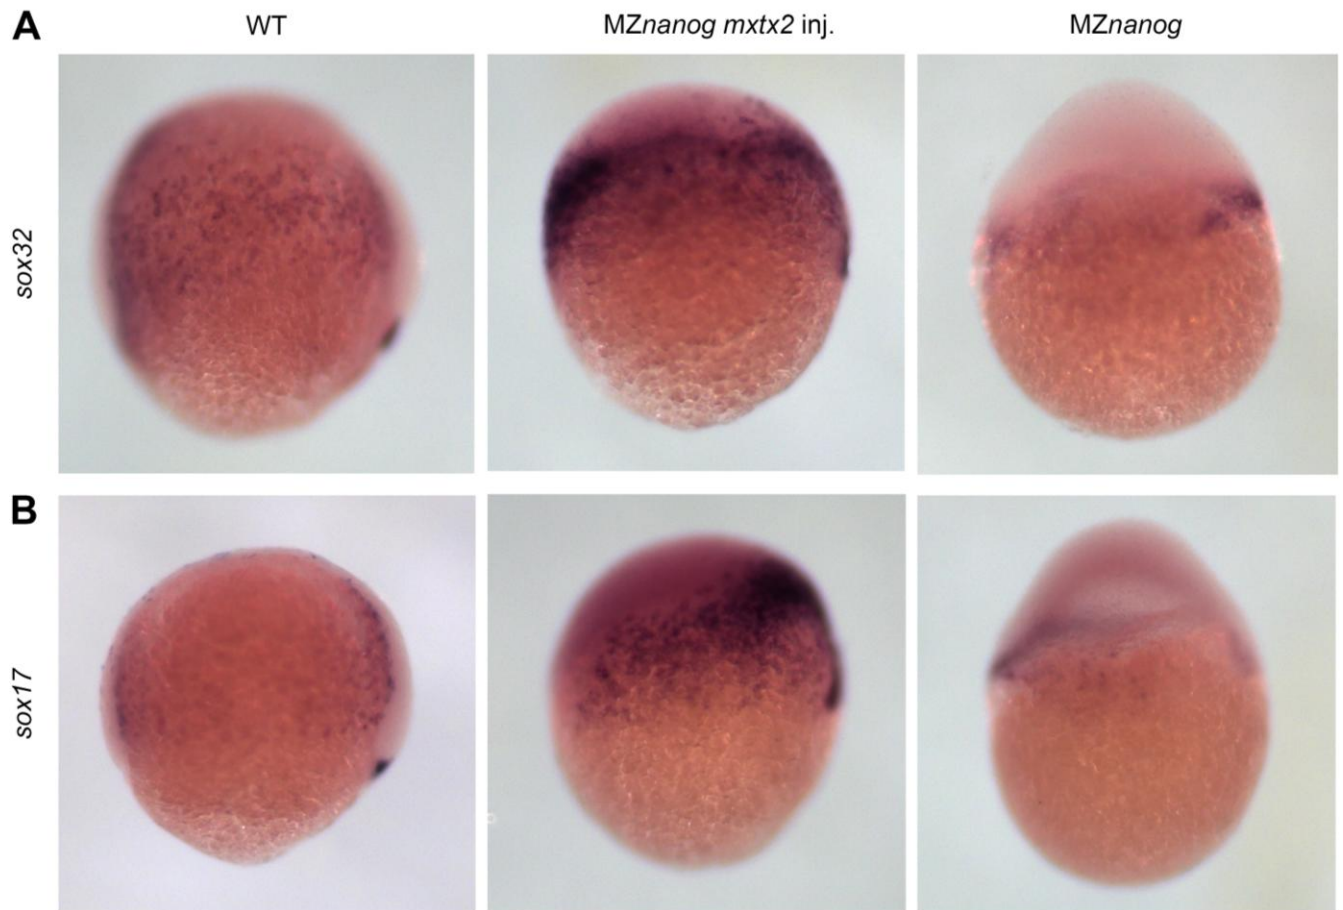

**Fig. S7. Excessive endoderm formation in *mxtx2*-injected *MZnanog* embryos.** *In-situ* hybridization of 8 hpf embryos with *sox32* (A) or *sox17* (B) probe, lateral views. *MZnanog* embryos were injected with 12 pg/embryo of *mxtx2* mRNA at 1-cell stage, or left non-injected as indicated above. Non-injected wild-type embryos were used as staining controls. Note that the amount of *sox32*- and *sox17*-positive cells in *mxtx2*-injected *MZnanog* visibly exceeds that number in *MZnanog* control and even in the wild-type stage-matched embryo.

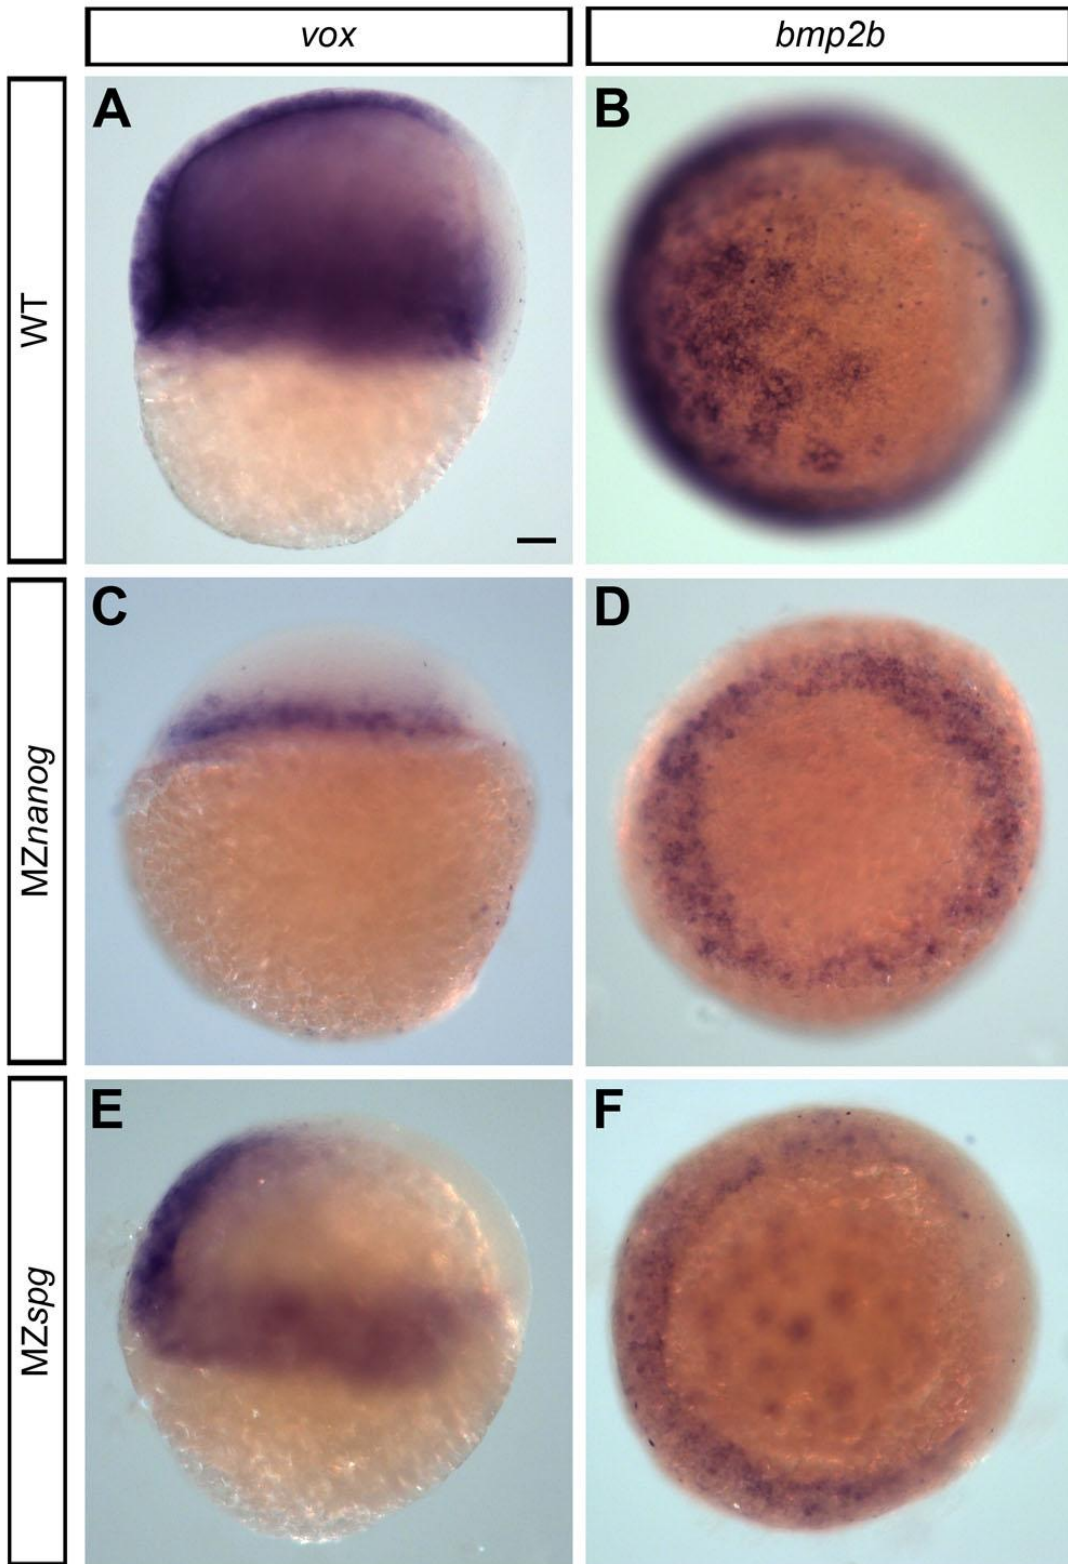

**Fig. S8.** Nanog is required for expression of ventral genes *bmp2b* and *vox*. *In situ* hybridization for *vox* (A,C,E) and *bmp2b* (B,D,F) at a closer look. Expression of both genes is



reduced in the mesoderm and missing from the ectoderm of *MZnanog*, while in *MZspg* expression in both tissues is reduced, but detectable. Scale bar corresponds to 100  $\mu\text{m}$ .

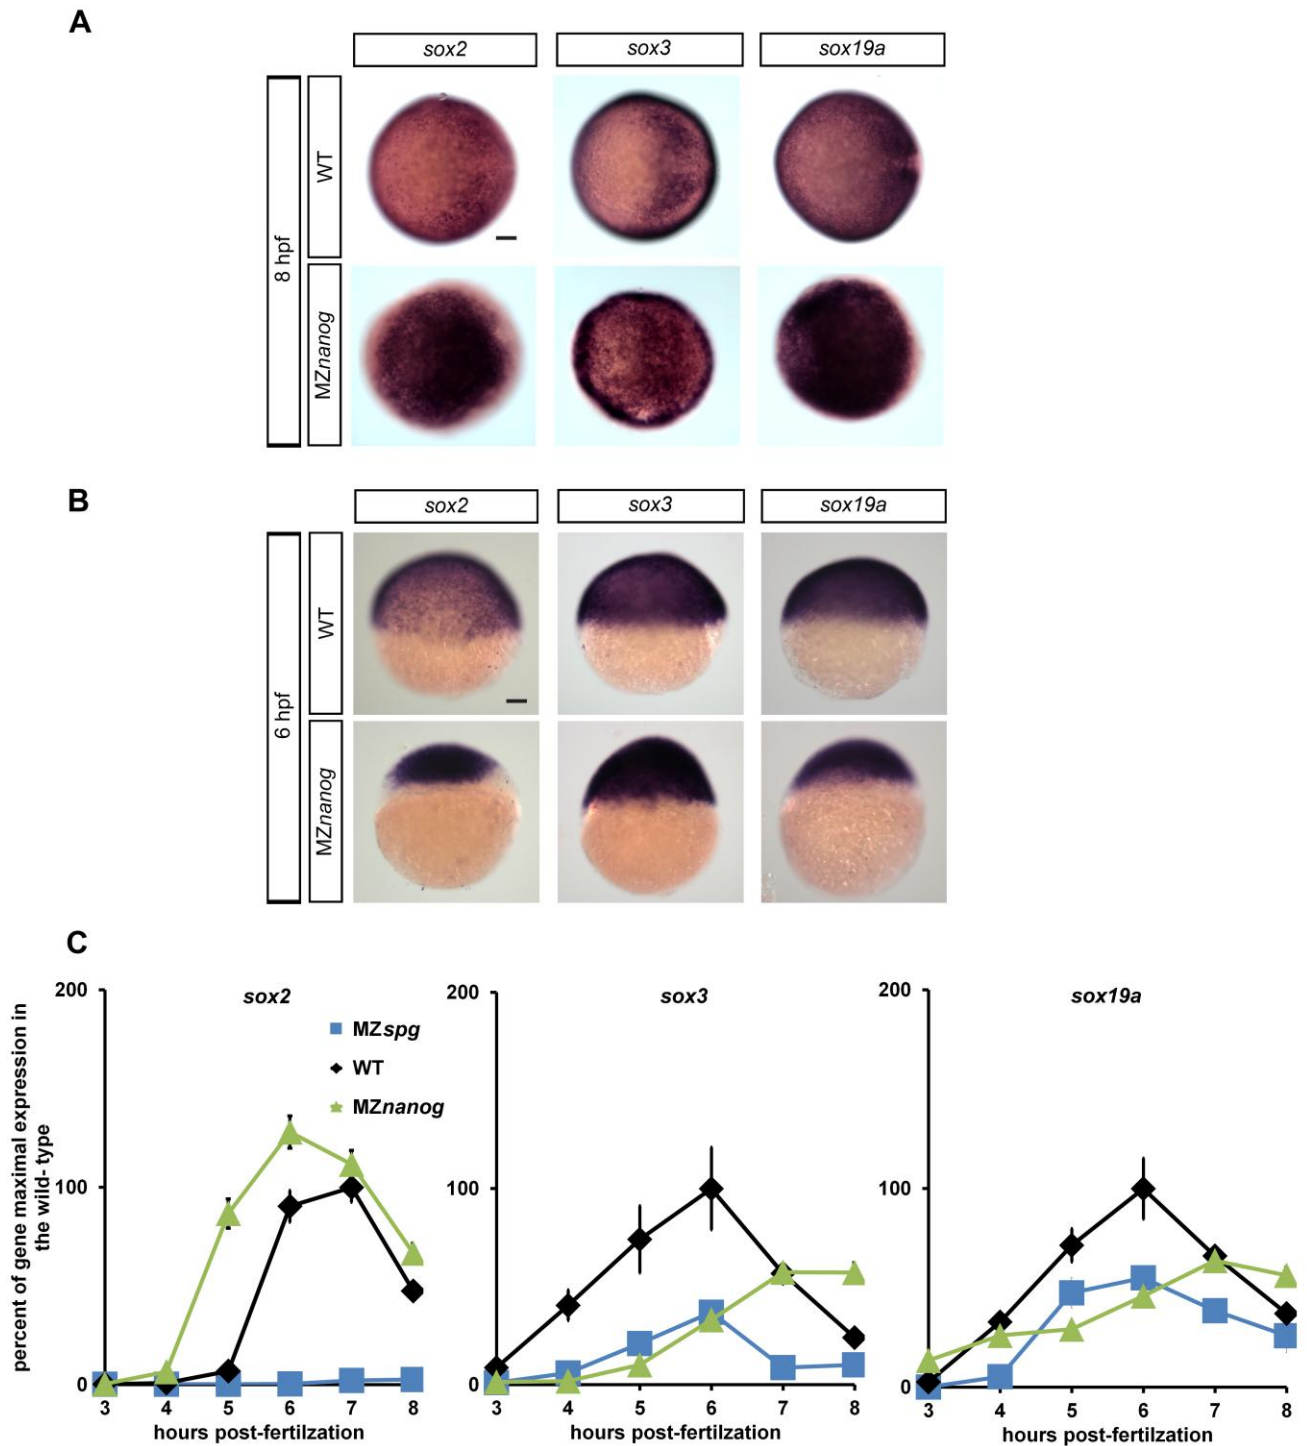

**Fig. S9. Expression of *sox2*, *sox3* and *sox19a* in the wild-type and *MZnanog* embryos.** (A) *In situ* hybridization at 8 hpf, animal view, dorsal to the right. Note that neural restriction of *soxb1* genes occurs in the wild-type but not in *MZnanog*. (B) *In situ* hybridization at 6 hpf, lateral view. (C) Graph shows time-curve generated by quantitative real time PCR on wild-

type, *MZnanog*, and *MZspg*. Embryos were collected in 1 hour intervals from 3 hpf till 8 hpf. All expression values were normalized to maximal expression in the wild-type. Note that *soxb1* genes change differently compared to the wild-type: *sox2* is moderately increased and expression starts 1 hour earlier, *sox3* expression starts later and is initially reduced, *sox19a* expression starts at the same time but is reduced at 5 and 6 hpf. At 8 hpf the levels of *sox3* and *sox19a* in *MZnanog* exceed the levels in the wild-type, which is probably due to the absence of neural restriction in *MZnanog* (see A).

## Supplementary tables

**Table S1. Numbers of counted mitotic and total cells at MZnanog and WT embryos.**  
Related to Fig. S1 and Materials and Methods.

| genotype | stage | embryo nr | mitotic cells | all nuclei | ratio mitotic/all |
|----------|-------|-----------|---------------|------------|-------------------|
| MZnanog  | 3 hpf | 1         | 10            | 91         | 0.10989           |
| MZnanog  | 3 hpf | 2         | 7             | 57         | 0.12281           |
| MZnanog  | 3 hpf | 3         | 4             | 79         | 0.05063           |
| MZnanog  | 3 hpf | 4         | 10            | 89         | 0.11236           |
| MZnanog  | 3 hpf | 5         | 12            | 113        | 0.10619           |
| MZnanog  | 3 hpf | 6         | 0             | 58         | 0                 |
| MZnanog  | 3 hpf | 7         | 0             | 90         | 0                 |
| MZnanog  | 3 hpf | 8         | 1             | 51         | 0.01961           |
| MZnanog  | 3 hpf | 9         | 3             | 61         | 0.04918           |
| MZnanog  | 3 hpf | 10        | 5             | 84         | 0.05952           |
| MZnanog  | 3 hpf | 11        | 6             | 97         | 0.06186           |
| MZnanog  | 3 hpf | 12        | 4             | 47         | 0.08511           |
| MZnanog  | 3 hpf | 13        | 12            | 98         | 0.12245           |
| MZnanog  | 3 hpf | 14        | 0             | 51         | 0                 |
| MZnanog  | 3 hpf | 15        | 0             | 85         | 0                 |
| MZnanog  | 3 hpf | 16        | 0             | 80         | 0                 |
| MZnanog  | 3 hpf | 17        | 0             | 63         | 0                 |
| MZnanog  | 3 hpf | 18        | 5             | 57         | 0.08772           |
| MZnanog  | 3 hpf | 19        | 8             | 65         | 0.12308           |
| MZnanog  | 3 hpf | 20        | 5             | 67         | 0.07463           |
| MZnanog  | 3 hpf | 21        | 9             | 86         | 0.10465           |
| MZnanog  | 3 hpf | 22        | 16            | 108        | 0.14815           |
| MZnanog  | 3 hpf | 23        | 5             | 110        | 0.04545           |
| MZnanog  | 3 hpf | 24        | 0             | 75         | 0                 |
| MZnanog  | 3 hpf | 25        | 6             | 69         | 0.08696           |
| MZnanog  | 3 hpf | 26        | 9             | 94         | 0.09574           |

|         |       |    |    |     |         |
|---------|-------|----|----|-----|---------|
| MZnanog | 3 hpf | 27 | 10 | 131 | 0.07634 |
| MZnanog | 3 hpf | 28 | 0  | 72  | 0       |
| MZnanog | 3 hpf | 29 | 7  | 86  | 0.0814  |
| MZnanog | 3 hpf | 30 | 1  | 64  | 0.01563 |
| MZnanog | 3 hpf | 31 | 3  | 96  | 0.03125 |
| MZnanog | 3 hpf | 32 | 5  | 89  | 0.05618 |
| WT      | 3 hpf | 1  | 12 | 65  | 0.18462 |
| WT      | 3 hpf | 2  | 11 | 97  | 0.1134  |
| WT      | 3 hpf | 3  | 2  | 100 | 0.02    |
| WT      | 3 hpf | 4  | 3  | 77  | 0.03896 |
| WT      | 3 hpf | 5  | 5  | 97  | 0.05155 |
| WT      | 3 hpf | 6  | 14 | 105 | 0.13333 |
| WT      | 3 hpf | 7  | 5  | 113 | 0.04425 |
| WT      | 3 hpf | 8  | 1  | 86  | 0.01163 |
| WT      | 3 hpf | 9  | 4  | 99  | 0.0404  |
| WT      | 3 hpf | 10 | 3  | 80  | 0.0375  |
| WT      | 3 hpf | 11 | 2  | 102 | 0.01961 |
| WT      | 3 hpf | 12 | 6  | 85  | 0.07059 |
| WT      | 3 hpf | 13 | 7  | 100 | 0.07    |
| WT      | 3 hpf | 14 | 8  | 101 | 0.07921 |
| WT      | 3 hpf | 15 | 4  | 78  | 0.05128 |
| WT      | 3 hpf | 16 | 3  | 105 | 0.02857 |
| WT      | 3 hpf | 17 | 1  | 93  | 0.01075 |
| WT      | 3 hpf | 18 | 8  | 107 | 0.07477 |
| WT      | 3 hpf | 19 | 3  | 96  | 0.03125 |
| WT      | 3 hpf | 20 | 11 | 54  | 0.2037  |
| WT      | 3 hpf | 21 | 11 | 91  | 0.12088 |
| WT      | 3 hpf | 22 | 19 | 110 | 0.17273 |
| WT      | 3 hpf | 23 | 7  | 111 | 0.06306 |
| WT      | 3 hpf | 24 | 2  | 87  | 0.02299 |
| WT      | 3 hpf | 25 | 3  | 88  | 0.03409 |
| WT      | 3 hpf | 26 | 13 | 122 | 0.10656 |
| WT      | 3 hpf | 27 | 14 | 81  | 0.17284 |
| WT      | 3 hpf | 28 | 15 | 88  | 0.17045 |

|         |       |    |    |     |         |
|---------|-------|----|----|-----|---------|
| WT      | 3 hpf | 29 | 17 | 109 | 0.15596 |
| WT      | 3 hpf | 30 | 4  | 111 | 0.03604 |
| MZnanog | 4 hpf | 1  | 21 | 290 | 0.07241 |
| MZnanog | 4 hpf | 2  | 18 | 296 | 0.06081 |
| MZnanog | 4 hpf | 3  | 21 | 246 | 0.08537 |
| MZnanog | 4 hpf | 4  | 17 | 303 | 0.05611 |
| MZnanog | 4 hpf | 5  | 13 | 227 | 0.05727 |
| MZnanog | 4 hpf | 6  | 17 | 222 | 0.07658 |
| MZnanog | 4 hpf | 7  | 18 | 213 | 0.08451 |
| MZnanog | 4 hpf | 8  | 17 | 356 | 0.04775 |
| MZnanog | 4 hpf | 9  | 9  | 227 | 0.03965 |
| MZnanog | 4 hpf | 10 | 12 | 309 | 0.03883 |
| MZnanog | 4 hpf | 11 | 27 | 244 | 0.11066 |
| MZnanog | 4 hpf | 12 | 21 | 212 | 0.09906 |
| MZnanog | 4 hpf | 13 | 11 | 200 | 0.055   |
| MZnanog | 4 hpf | 14 | 23 | 258 | 0.08915 |
| MZnanog | 4 hpf | 15 | 22 | 291 | 0.0756  |
| MZnanog | 4 hpf | 16 | 13 | 214 | 0.06075 |
| MZnanog | 4 hpf | 17 | 22 | 283 | 0.07774 |
| MZnanog | 4 hpf | 18 | 14 | 240 | 0.05833 |
| MZnanog | 4 hpf | 19 | 28 | 274 | 0.10219 |
| MZnanog | 4 hpf | 20 | 16 | 285 | 0.05614 |
| MZnanog | 4 hpf | 21 | 28 | 339 | 0.0826  |
| MZnanog | 4 hpf | 22 | 15 | 277 | 0.05415 |
| MZnanog | 4 hpf | 23 | 16 | 192 | 0.08333 |
| MZnanog | 4 hpf | 24 | 22 | 165 | 0.13333 |
| MZnanog | 4 hpf | 25 | 25 | 238 | 0.10504 |
| MZnanog | 4 hpf | 26 | 16 | 255 | 0.06275 |
| MZnanog | 4 hpf | 27 | 30 | 242 | 0.12397 |
| MZnanog | 4 hpf | 28 | 19 | 342 | 0.05556 |
| MZnanog | 4 hpf | 29 | 15 | 183 | 0.08197 |
| MZnanog | 4 hpf | 30 | 20 | 255 | 0.07843 |
| MZnanog | 4 hpf | 31 | 14 | 217 | 0.06452 |
| MZnanog | 4 hpf | 32 | 26 | 271 | 0.09594 |

|         |       |    |    |     |         |
|---------|-------|----|----|-----|---------|
| MZnanog | 4 hpf | 33 | 14 | 272 | 0.05147 |
| MZnanog | 4 hpf | 34 | 15 | 366 | 0.04098 |
| MZnanog | 4 hpf | 35 | 19 | 240 | 0.07917 |
| MZnanog | 4 hpf | 36 | 19 | 234 | 0.0812  |
| MZnanog | 4 hpf | 37 | 21 | 285 | 0.07368 |
| WT      | 4 hpf | 1  | 14 | 175 | 0.08    |
| WT      | 4 hpf | 2  | 33 | 368 | 0.08967 |
| WT      | 4 hpf | 3  | 12 | 151 | 0.07947 |
| WT      | 4 hpf | 4  | 7  | 97  | 0.07216 |
| WT      | 4 hpf | 5  | 29 | 280 | 0.10357 |
| WT      | 4 hpf | 6  | 28 | 299 | 0.09365 |
| WT      | 4 hpf | 7  | 24 | 226 | 0.10619 |
| WT      | 4 hpf | 8  | 13 | 245 | 0.05306 |
| WT      | 4 hpf | 9  | 12 | 273 | 0.04396 |
| WT      | 4 hpf | 10 | 21 | 228 | 0.09211 |
| WT      | 4 hpf | 11 | 26 | 285 | 0.09123 |
| WT      | 4 hpf | 12 | 15 | 210 | 0.07143 |
| WT      | 4 hpf | 13 | 33 | 280 | 0.11786 |
| WT      | 4 hpf | 14 | 19 | 212 | 0.08962 |
| WT      | 4 hpf | 15 | 22 | 300 | 0.07333 |
| WT      | 4 hpf | 16 | 25 | 312 | 0.08013 |
| WT      | 4 hpf | 17 | 13 | 293 | 0.04437 |
| WT      | 4 hpf | 18 | 24 | 312 | 0.07692 |
| WT      | 4 hpf | 19 | 25 | 273 | 0.09158 |
| WT      | 4 hpf | 20 | 16 | 350 | 0.04571 |
| WT      | 4 hpf | 21 | 17 | 223 | 0.07623 |
| WT      | 4 hpf | 22 | 14 | 227 | 0.06167 |
| WT      | 4 hpf | 23 | 14 | 203 | 0.06897 |
| WT      | 4 hpf | 24 | 23 | 311 | 0.07395 |
| WT      | 4 hpf | 25 | 18 | 275 | 0.06545 |
| WT      | 4 hpf | 26 | 22 | 213 | 0.10329 |
| WT      | 4 hpf | 27 | 19 | 211 | 0.09005 |
| WT      | 4 hpf | 28 | 25 | 294 | 0.08503 |
| WT      | 4 hpf | 29 | 23 | 297 | 0.07744 |

|         |         |    |    |     |         |
|---------|---------|----|----|-----|---------|
| WT      | 4 hpf   | 30 | 32 | 403 | 0.0794  |
| WT      | 4 hpf   | 31 | 21 | 288 | 0.07292 |
| WT      | 4 hpf   | 32 | 30 | 409 | 0.07335 |
| WT      | 4 hpf   | 33 | 31 | 351 | 0.08832 |
| WT      | 4 hpf   | 34 | 17 | 256 | 0.06641 |
| MZnanog | 4.7 hpf | 1  | 26 | 358 | 0.07263 |
| MZnanog | 4.7 hpf | 2  | 13 | 299 | 0.04348 |
| MZnanog | 4.7 hpf | 3  | 16 | 219 | 0.07306 |
| MZnanog | 4.7 hpf | 4  | 14 | 203 | 0.06897 |
| MZnanog | 4.7 hpf | 5  | 1  | 280 | 0.00357 |
| MZnanog | 4.7 hpf | 6  | 15 | 214 | 0.07009 |
| MZnanog | 4.7 hpf | 7  | 25 | 411 | 0.06083 |
| MZnanog | 4.7 hpf | 8  | 23 | 318 | 0.07233 |
| MZnanog | 4.7 hpf | 9  | 18 | 290 | 0.06207 |
| MZnanog | 4.7 hpf | 10 | 14 | 313 | 0.04473 |
| MZnanog | 4.7 hpf | 11 | 15 | 261 | 0.05747 |
| MZnanog | 4.7 hpf | 12 | 16 | 270 | 0.05926 |
| MZnanog | 4.7 hpf | 13 | 16 | 212 | 0.07547 |
| MZnanog | 4.7 hpf | 14 | 20 | 317 | 0.06309 |
| MZnanog | 4.7 hpf | 15 | 29 | 419 | 0.06921 |
| MZnanog | 4.7 hpf | 16 | 29 | 404 | 0.07178 |
| MZnanog | 4.7 hpf | 17 | 15 | 188 | 0.07979 |
| MZnanog | 4.7 hpf | 18 | 16 | 384 | 0.04167 |
| MZnanog | 4.7 hpf | 19 | 24 | 347 | 0.06916 |
| WT      | 4.7 hpf | 1  | 12 | 323 | 0.03715 |
| WT      | 4.7 hpf | 2  | 14 | 319 | 0.04389 |
| WT      | 4.7 hpf | 3  | 28 | 260 | 0.10769 |
| WT      | 4.7 hpf | 4  | 13 | 259 | 0.05019 |
| WT      | 4.7 hpf | 5  | 25 | 349 | 0.07163 |
| WT      | 4.7 hpf | 6  | 27 | 346 | 0.07803 |
| WT      | 4.7 hpf | 7  | 10 | 258 | 0.03876 |
| WT      | 4.7 hpf | 8  | 20 | 234 | 0.08547 |
| WT      | 4.7 hpf | 9  | 23 | 348 | 0.06609 |
| WT      | 4.7 hpf | 10 | 17 | 330 | 0.05152 |



|    |         |    |    |     |         |
|----|---------|----|----|-----|---------|
| WT | 4.7 hpf | 11 | 14 | 303 | 0.0462  |
| WT | 4.7 hpf | 12 | 21 | 366 | 0.05738 |
| WT | 4.7 hpf | 13 | 26 | 321 | 0.081   |
| WT | 4.7 hpf | 14 | 13 | 246 | 0.05285 |
| WT | 4.7 hpf | 15 | 14 | 254 | 0.05512 |
| WT | 4.7 hpf | 16 | 18 | 343 | 0.05248 |
| WT | 4.7 hpf | 17 | 35 | 341 | 0.10264 |
| WT | 4.7 hpf | 18 | 25 | 340 | 0.07353 |
| WT | 4.7 hpf | 19 | 13 | 381 | 0.03412 |
| WT | 4.7 hpf | 20 | 15 | 208 | 0.07212 |
| WT | 4.7 hpf | 21 | 14 | 365 | 0.03836 |
| WT | 4.7 hpf | 22 | 18 | 227 | 0.0793  |
| WT | 4.7 hpf | 23 | 33 | 342 | 0.09649 |
| WT | 4.7 hpf | 24 | 22 | 305 | 0.07213 |
| WT | 4.7 hpf | 25 | 13 | 307 | 0.04235 |

**Table S2. *In-situ* hybridization statistics for rescue assays.** Related to main text and Fig.

6.

| genotype<br>treatment                  | eomesa 6 hpf |          |         | mxtx2 4.3 hpf |          |         | sox32 8 hpf |          |         | sox17 8 hpf |          |         |
|----------------------------------------|--------------|----------|---------|---------------|----------|---------|-------------|----------|---------|-------------|----------|---------|
|                                        | stain        | no stain | n total | stain         | no stain | n total | stain       | no stain | n total | stain       | no stain | n total |
| WT                                     | 0            | 42       | 42      | 18            | 0        | 18      | 8           | 0        | 8       | 6           | 0        | 6       |
| MZ <i>nanog</i>                        | 19           | 0        | 19      | 0             | 20       | 20      | 6           | 2        | 8       | 9           | 5        | 14      |
| MZ <i>nanog</i> plus <i>mxtx2</i> mRNA |              |          |         |               |          |         | 10          | 0        | 10      | 13          | 0        | 13      |
| MZ <i>nanog</i> plus miR-430           | 5            | 14       | 19      |               |          |         | 13          | 2        | 15      | 19          | 2        | 21      |
| MZ <i>nanog</i> plus miR-430 mism      | 14           | 0        | 14      |               |          |         |             |          |         |             |          |         |
| MZ <i>nanog</i> plus <i>nanog</i> mRNA |              |          |         | 20            | 0        | 20      | 14          | 9        | 25      | 16          | 2        | 18      |

**Table S3. Cotransplantation of labeled nanog  $-/-$  and wild type  $(+/+)$  cells**

(related to the main text, Fig. 8)

| #<br>embr<br>yo | #<br>ex<br>p. | color<br>(r,g),<br>transpl.o<br>rder(1,2) |          | skin     |          | neural   |          | muscle   |          | notochor<br>d |          | placode<br>s |          | floorplate |          | beans    |          |
|-----------------|---------------|-------------------------------------------|----------|----------|----------|----------|----------|----------|----------|---------------|----------|--------------|----------|------------|----------|----------|----------|
|                 |               | +/+<br>+                                  | -<br>-/- | +/+<br>+ | -<br>-/- | +/+<br>+ | -<br>-/- | +/+<br>+ | -<br>-/- | +/+<br>+      | -<br>-/- | +/+<br>+     | -<br>-/- | +/+<br>+   | -<br>-/- | +/+<br>+ | -<br>-/- |
| 1               | 1             | 2g                                        | 1r       | 5        | 5        | 0        | 0        | 2        | 1        | 6             | 5        | 0            | 3        | 0          | 0        | 0        | 0        |
| 2               | 1             | 2g                                        | 1r       | 0        | 0        | 0        | 0        | 10       | 2        | 0             | 0        | 0            | 0        | 0          | 0        | 0        | 2        |
| 3               | 1             | 2g                                        | 1r       | 0        | 5        | 10       | 3        | 4        | 0        | 7             | 0        | 3            | 0        | 1          | 0        | 0        | 0        |
| 4               | 1             | 2g                                        | 1r       | 5        | 5        | 10       | 0        | 4        | 2        | 0             | 0        | 0            | 0        | 0          | 0        | 0        | 0        |
| 5               | 1             | 2g                                        | 1r       | 0        | 0        | 6        | 0        | 0        | 3        | 0             | 0        | 5            | 0        | 0          | 0        | 0        | 0        |
| 6               | 1             | 2g                                        | 1r       | 3        | 7        | 0        | 0        | 10       | 4        | 0             | 0        | 3            | 0        | 0          | 0        | 0        | 2        |
| 7               | 2             | 1g                                        | 2r       | 0        | 0        | 0        | 0        | 0        | 0        | 0             | 0        | 2            | 0        | 0          | 0        | 1        | 2        |
| 8               | 2             | 1g                                        | 2r       | 5        | 2        | 3        | 2        | 5        | 0        | 0             | 0        | 0            | 0        | 0          | 0        | 2        | 4        |
| 9               | 2             | 1g                                        | 2r       | 0        | 0        | 0        | 0        | 0        | 0        | 0             | 0        | 0            | 0        | 0          | 0        | 0        | 1        |
| 10              | 2             | 1g                                        | 2r       | 0        | 6        | 0        | 0        | 0        | 0        | 0             | 0        | 0            | 0        | 0          | 0        | 0        | 0        |
| 11              | 2             | 1g                                        | 2r       | 6        | 3        | 0        | 0        | 0        | 0        | 0             | 0        | 0            | 0        | 0          | 0        | 0        | 1        |
| 12              | 2             | 1g                                        | 2r       | 0        | 15       | 0        | 0        | 0        | 0        | 0             | 0        | 0            | 0        | 0          | 0        | 0        | 2        |
| 13              | 2             | 1g                                        | 2r       | 3        | 0        | 4        | 0        | 0        | 0        | 2             | 0        | 0            | 0        | 0          | 0        | 0        | 0        |
| 14              | 2             | 1g                                        | 2r       | 7        | 6        | 0        | 0        | 6        | 0        | 4             | 0        | 0            | 0        | 0          | 0        | 0        | 0        |
| 15              | 2             | 1g                                        | 2r       | 6        | 4        | 4        | 0        | 4        | 2        | 0             | 0        | 5            | 0        | 0          | 0        | 0        | 0        |
| 16              | 3             | 2r                                        | 1g       | 10       | 0        | 2        | 0        | 10       | 0        | 0             | 0        | 0            | 0        | 0          | 0        | 0        | 0        |
| 17              | 3             | 2r                                        | 1g       | 8        | 1        | 1        | 2        | 3        | 0        | 0             | 0        | 0            | 0        | 0          | 0        | 0        | 1        |
| 18              | 3             | 2r                                        | 1g       | 8        | 0        | 0        | 0        | 1        | 0        | 0             | 0        | 0            | 0        | 0          | 0        | 0        | 1        |
| 19              | 3             | 2r                                        | 1g       | 0        | 2        | 0        | 0        | 1        | 2        | 0             | 0        | 0            | 0        | 0          | 0        | 0        | 1        |
| 20              | 3             | 2r                                        | 1g       | 7        | 0        | 6        | 0        | 0        | 0        | 12            | 0        | 0            | 0        | 0          | 0        | 0        | 1        |
| 21              | 3             | 2r                                        | 1g       | 8        | 2        | 2        | 0        | 0        | 0        | 0             | 0        | 6            | 3        | 0          | 0        | 0        | 0        |
| 22              | 3             | 2r                                        | 1g       | 0        | 0        | 0        | 1        | 2        | 0        | 0             | 0        | 3            | 2        | 0          | 0        | 0        | 1        |
| 23              | 3             | 2r                                        | 1g       | 0        | 0        | 0        | 0        | 0        | 0        | 0             | 0        | 0            | 0        | 0          | 0        | 1        | 1        |
| 24              | 4             | 1r                                        | 2g       | 0        | 0        | 5        | 0        | 0        | 0        | 0             | 0        | 0            | 0        | 0          | 0        | 0        | 1        |
| 25              | 4             | 1r                                        | 2g       | 3        | 0        | 0        | 0        | 1        | 0        | 6             | 0        | 0            | 0        | 9          | 0        | 0        | 1        |

|    |    |    |    |    |   |    |   |    |    |    |   |    |   |   |   |   |   |
|----|----|----|----|----|---|----|---|----|----|----|---|----|---|---|---|---|---|
| 26 | 4  | 1r | 2g | 0  | 0 | 0  | 0 | 0  | 0  | 0  | 0 | 4  | 0 | 0 | 0 | 0 | 1 |
| 27 | 5  | 1r | 2g | 5  | 0 | 15 | 0 | 4  | 0  | 0  | 0 | 10 | 0 | 9 | 0 | 0 | 0 |
| 28 | 5  | 1r | 2g | 0  | 0 | 0  | 0 | 0  | 0  | 0  | 0 | 10 | 0 | 0 | 0 | 0 | 0 |
| 29 | 5  | 1r | 2g | 3  | 2 | 0  | 0 | 0  | 0  | 0  | 0 | 0  | 0 | 0 | 0 | 1 | 0 |
| 30 | 5  | 1r | 2g | 0  | 0 | 3  | 0 | 0  | 0  | 0  | 0 | 0  | 0 | 0 | 0 | 0 | 0 |
| 31 | 5  | 1r | 2g | 5  | 0 | 7  | 0 | 15 | 0  | 0  | 0 | 2  | 0 | 7 | 0 | 0 | 0 |
| 32 | 5  | 1r | 2g | 10 | 0 | 5  | 0 | 10 | 0  | 0  | 0 | 4  | 0 | 0 | 0 | 0 | 0 |
| 33 | 6  | 2g | 1r | 5  | 0 | 10 | 0 | 14 | 0  | 0  | 0 | 3  | 0 | 0 | 0 | 0 | 0 |
| 34 | 6  | 2g | 1r | 7  | 0 | 3  | 0 | 0  | 0  | 2  | 0 | 0  | 1 | 0 | 0 | 0 | 1 |
| 35 | 7  | 1r | 2g | 3  | 0 | 0  | 0 | 0  | 0  | 0  | 0 | 0  | 0 | 0 | 0 | 0 | 0 |
| 36 | 7  | 1r | 2g | 0  | 5 | 15 | 7 | 0  | 0  | 0  | 0 | 0  | 0 | 0 | 0 | 0 | 0 |
| 37 | 7  | 1r | 2g | 10 | 5 | 20 | 0 | 6  | 0  | 0  | 0 | 3  | 0 | 0 | 0 | 0 | 0 |
| 38 | 7  | 1r | 2g | 0  | 0 | 4  | 0 | 0  | 0  | 0  | 0 | 0  | 0 | 0 | 0 | 0 | 1 |
| 39 | 8  | 2r | 1g | 0  | 0 | 0  | 0 | 5  | 0  | 0  | 0 | 2  | 0 | 0 | 0 | 0 | 0 |
| 40 | 8  | 2r | 1g | 15 | 0 | 9  | 0 | 8  | 0  | 0  | 0 | 7  | 0 | 0 | 0 | 0 | 0 |
| 41 | 9  | 2r | 1g | 9  | 0 | 10 | 0 | 7  | 0  | 0  | 0 | 0  | 0 | 0 | 0 | 0 | 0 |
| 42 | 9  | 2r | 1g | 9  | 0 | 5  | 0 | 0  | 0  | 7  | 0 | 8  | 0 | 3 | 0 | 0 | 0 |
| 43 | 9  | 2r | 1g | 6  | 2 | 5  | 0 | 7  | 0  | 0  | 0 | 6  | 0 | 0 | 0 | 0 | 0 |
| 44 | 9  | 2r | 1g | 0  | 0 | 10 | 3 | 4  | 0  | 10 | 0 | 0  | 0 | 0 | 0 | 0 | 0 |
| 45 | 9  | 2r | 1g | 5  | 0 | 3  | 0 | 3  | 0  | 0  | 0 | 0  | 0 | 0 | 0 | 1 | 0 |
| 46 | 9  | 2r | 1g | 0  | 0 | 0  | 0 | 6  | 0  | 3  | 0 | 5  | 0 | 0 | 0 | 0 | 0 |
| 47 | 10 | 2g | 1r | 10 | 0 | 5  | 0 | 0  | 0  | 0  | 0 | 10 | 0 | 0 | 0 | 0 | 1 |
| 48 | 10 | 2g | 1r | 8  | 0 | 10 | 0 | 3  | 0  | 5  | 0 | 7  | 0 | 3 | 0 | 0 | 2 |
| 49 | 10 | 2g | 1r | 10 | 8 | 0  | 2 | 20 | 10 | 0  | 0 | 0  | 0 | 0 | 0 | 0 | 0 |
| 50 | 10 | 2g | 1r | 5  | 0 | 0  | 0 | 0  | 0  | 4  | 0 | 10 | 1 | 2 | 0 | 0 | 0 |
| 51 | 10 | 2g | 1r | 6  | 5 | 8  | 0 | 20 | 8  | 0  | 0 | 2  | 1 | 0 | 0 | 0 | 0 |
| 52 | 10 | 2g | 1r | 15 | 0 | 10 | 0 | 20 | 0  | 0  | 0 | 2  | 0 | 0 | 0 | 0 | 0 |

**Table S4. Sequences of PCR primers used in this work, 5' to 3'.** Related to Materials and Methods.

The following primers were used (5' to 3'):

|              |                            |
|--------------|----------------------------|
| rpl5bf3      | GGGGATGAGTTCAATGTGGAG      |
| rpl5br3      | CGAACACCTTATTGCCAGTAG      |
| EGFP_sybr_f1 | GCGAGGGCGATGCCACCTAC       |
| EGFP_sybr_r1 | CGCCGTAGGTCAGGGTGGTC       |
| her3_f       | CACGCTGGTTACAGAAGTTGTCTCA  |
| her3_r       | TGTGGTTAAGACCGCTCGTAAGATT  |
| sox2_f       | GAACACCAACTCCTCGGGAAACAACC |
| sox2_r       | TGTGCATTTTGGGGTTCTCCTGTG   |
| sox19a_f     | ATGAAGTCCGCCGTGCCACC       |
| sox19a_r     | CGCCTCTGACCCCGAGACCA       |
| foxD3_f      | GCTTTCAGCTCTCAGCTAAGTCCAAG |
| foxD3_r      | ACCCCGATGATGTTTTCTATGCTG   |
| sox3_f       | GCCTCGGTGCTGACTGGAAA       |
| sox3_r       | GGAGTCCCCCTGGCAAAGAA       |

**Table S5. *In situ* hybridization probes used in this study.** Related to Material and Methods, *in situ* hybridization section.

| gene name       | Ref-Seq      | References                    |
|-----------------|--------------|-------------------------------|
| <i>bmp2b</i>    | NM_131360    | Hammerschmidt et al., 1996a   |
| <i>chrd</i>     | NM_130973    | Miller-Bertoglio et al., 1999 |
| <i>eomesa</i>   | NM_131679    | this study                    |
| <i>foxd3</i>    | NM_131290    | Onichtchouk et al., 2010      |
| <i>gata5</i>    | NM_131235    | Reiter et al., 1999           |
| <i>gsc</i>      | NM_131017    | Schulte-Merker et al., 1994   |
| <i>her3</i>     | NM_131080    | Onichtchouk et al., 2010      |
| <i>mixer</i>    | NM_130940    | Henry et al., 1998            |
| <i>mxtx2</i>    | NM_001079816 | this study                    |
| <i>ntl (ta)</i> | NM_131162    | Schulte-Merker et al., 1994   |
| <i>sox17</i>    | NM_131287    | Alexander and Stainier, 1999  |
| <i>sox19a</i>   | NM_130908    | this study                    |
| <i>sox2</i>     | NM_213118    | Onichtchouk et al., 2010      |
| <i>sox3</i>     | NM_001001811 | Onichtchouk et al., 2010      |
| <i>sox32</i>    | NM_131851    | Dickmeis et al., 2001         |
| <i>vent</i>     | NM_131700    | Kawahara et al., 2000         |
| <i>vox</i>      | NM_131698    | Kawahara et al., 2000         |

**Table S6. Primers used for cloning the plasmid templates for *in situ* probes (from 5' to 3').**

| gene name     | forward Primer          | reverse Primer             |
|---------------|-------------------------|----------------------------|
| <i>eomesa</i> | TCTGTACCCGTCCTATCCCG    | AGATCCTGTTTGGTGGTCGC       |
| <i>mxtx2</i>  | CTCAATGAAAGACATGTGGACTG | CTCTGTAGGTTATGGATGTTTGC    |
| <i>sox19a</i> | GCTGAAAAGGACAACCCGGCTGC | TTTCCTGATCAGATGTGTGTGAGAGG |

## Supplementary References

Alexander, J. and Stainier, D. Y. (1999) A molecular pathway leading to endoderm formation in zebrafish, *Current biology : CB* 9(20): 1147-57.

Dickmeis, T., Mourrain, P., Saint-Etienne, L., Fischer, N., Aanstad, P., Clark, M., Strahle, U., and Rosa, F. (2001). A crucial component of the endoderm formation pathway, CASANOVA, is encoded by a novel sox-related gene. *Genes Dev.* 15, 1487–1492.

Hammerschmidt, M., Pelegri, F., Mullins, M. C., Kane, D. A., van Eeden, F. J., Granato, M., Brand, M., Furutani-Seiki, M., Haffter, P., Heisenberg, C. P., Jiang, Y. J., Kelsh, R. N., Odenthal, J., Warga, R. M., Nusslein-Volhard, C. (1996) dino and mercedes, two genes regulating dorsal development in the zebrafish embryo. *Development* 123: 95-102.

Henry, G. L. and Melton, D. A. (1998) Mixer, a homeobox gene required for endoderm development, *Science* 281(5373): 91-6.

Kawahara, A., Wilm, T., Solnica-Krezel, L., and Dawid, I. B. (2000) Functional interaction of *vega1* and *gooseoid* homeobox genes in zebrafish. *Genesis* 28: 58-67.

Kawahara, A., Wilm, T., Solnica-Krezel, L., and Dawid, I. B. (2000) Antagonistic role of *vega1* and *bozozok/dharma* homeobox genes in organizer formation. *Proc Natl Acad Sci U S A* 97(22): 12121-12126.

Miller-Bertoglio, V., Carmany-Rampey, A., Fuerthauer, M., Gonzalez, E. M., Thisse, C., Thisse, B., Halpern, M. E., Solnica-Krezel, L. (1999) Maternal and zygotic activity of the zebrafish *ogon* locus antagonizes BMP signaling. *Dev. Biol.* 214: 72-86.

Onichtchouk, D., Geier, F., Polok, B., Messerschmidt, D. M., Mossner, R., Wendik, B., Song, S., Taylor, V., Timmer, J. and Driever, W. (2010) Zebrafish Pou5f1-dependent transcriptional networks in temporal control of early development, *Molecular systems biology* 6: 354.

Reiter, J. F., Alexander, J., Rodaway, A., Yelon, D., Patient, R., Holder, N. and Stainier, D. Y. (1999) *Gata5* is required for the development of the heart and endoderm in zebrafish, *Genes & development* 13(22): 2983-95.

Schulte-Merker, S., van Eeden, F. J., Halpern, M. E., Kimmel, C. B. and Nüsslein-Volhard, C. (1994) no tail (*ntl*) is the zebrafish homologue of the mouse T (Brachyury) gene, *Development* 120(4): 1009-15.

Schulte-Merker, S., Hammerschmidt, M., Beuchle, D., Cho, K. W., De Robertis, E. M., and Nusslein-Volhard, C. (1994) Expression of zebrafish *gooseoid* and *no tail* gene products in wild-type and mutant *no tail* embryos. *Development.* 120(4): 843-852.
